# Supplementary material for: Breakdown of abdominal patterning in the Tribolium Kruppel mutant jaws
Source: Oxford University Press journal article supplement (doi:10.1242/dev.02154), 2005-11-10
Supplement: dev02154figs1.pdf [file dev02154figs1.pdf]

MPLLQETTPK RDMLDSQEKI PLSSVSYPSPM FTFSQLLMAS HLMAASRLSL  
PTNPAFFHPG LLPLAWQANS PPSPPAPSEL PALKSRKLNN NNVVSSTNQE  
IRGPKRKTWK VEEDSPSPTS SVSPEVKDSS RDRPFTCEVC NRSFGYKHVL  
QNHERHTTGE KPFECQECHK RFTRDHHLKT HMRLHTGERP YRCEHCDRQF  
VQVANLRRHL RVHTGERPYG CEHCSMKFSD SNQLKAHVLI HTNEKPFECD  
KCRGRFRRRH HLVHHKCGGE EEAERAPAPA VRAAGDAAAA RGAARADGAG  
GPLHDHRPAL AQORRVAAVQ VPQLAGGRR GPGPARSRRH LPAHLVAGTC  
FVQLIGMRVP PEMMQAGDYC
